# Supplementary material for: Looking for the sponge loop: analyses of detritus on a Caribbean forereef using stable isotope and eDNA metabarcoding techniques
Source: PubMed Central journal article supplement (PMC10896084; doi:10.7717/peerj.16970), 2024-02-23

Source

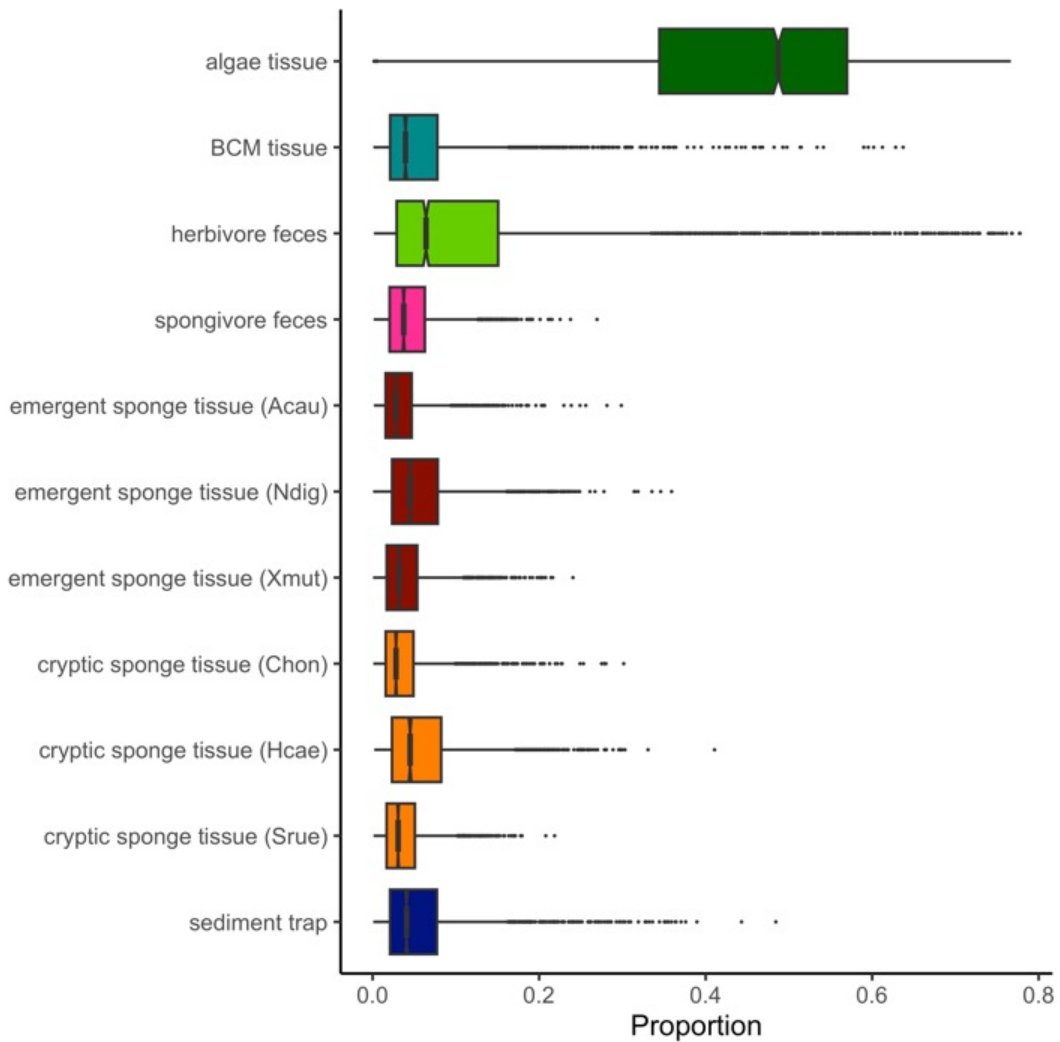

Supplement: peerj-12-16970-s003.pdf [file peerj-12-16970-s003.pdf]
