# Supplementary material for: Looking for the sponge loop: analyses of detritus on a Caribbean forereef using stable isotope and eDNA metabarcoding techniques
Source: PubMed Central journal article supplement (PMC10896084; doi:10.7717/peerj.16970), 2024-02-23
Supplement: peerj-12-16970-s004.pdf [file peerj-12-16970-s004.pdf]

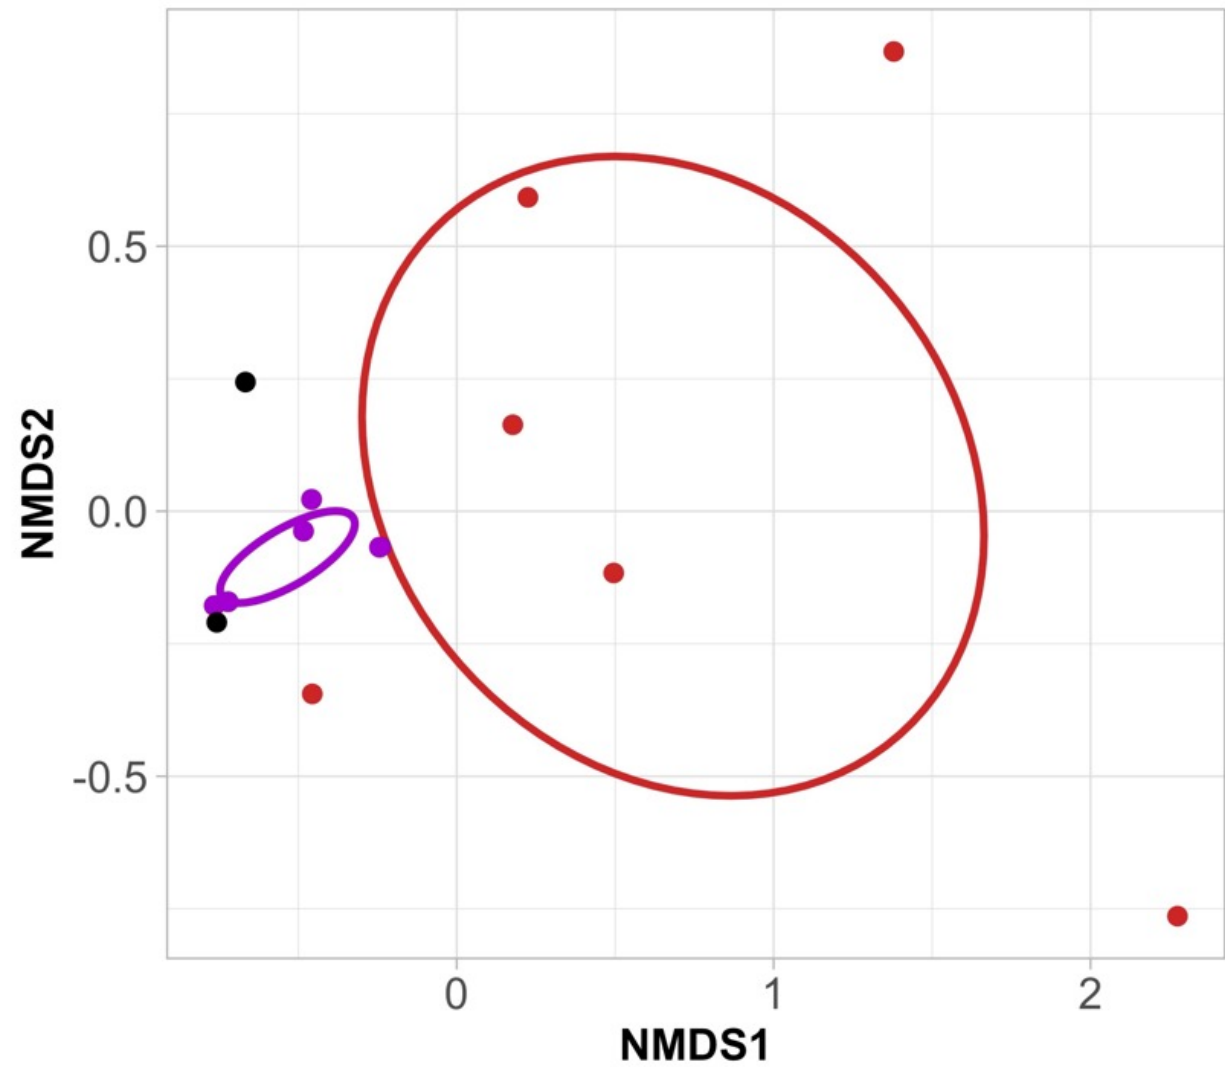

● 2018 EAM detritus    ● 2019 EAM detritus    ● tray detritus
